# Supplementary material for: Long-ranged charge order conspired by magnetism and lattice in an antiferromagnetic Kagome metal
Source: Research Square preprint supplement (doi:10.21203/rs.3.rs-3180648/v1), 2023-11-30
Supplement: Supplementary file 1 [file 4bba5f97e9b2cad5f5fc0d6d.pdf]

Supplementary Materials for  
“Long-ranged charge order conspired by magnetism and lattice in an  
antiferromagnetic Kagome metal”

Ziyuan Chen<sup>1,†</sup>, Xueliang Wu<sup>2,†</sup>, Shiming Zhou<sup>1,†</sup>, Jiakang Zhang<sup>1</sup>, Ruotong Yin<sup>1</sup>, Yuanji Li<sup>1</sup>,  
Mingzhe Li<sup>1</sup>, Jiashuo Gong<sup>1</sup>, Mingquan He<sup>2</sup>, Yisheng Chai<sup>2</sup>, Xiaoyuan Zhou<sup>2</sup>, Yilin Wang<sup>1,3,\*</sup>,  
Aifeng Wang<sup>2,\*</sup>, Ya-Jun Yan<sup>1,\*</sup>, Dong-Lai Feng<sup>1,3,4,5,\*</sup>

<sup>1</sup> School of Emerging Technology and Department of Physics, University of Science and Technology of China, Hefei, 230026, China

<sup>2</sup> Low temperature Physics Laboratory, College of Physics and Center of Quantum Materials and Devices, Chongqing University, Chongqing 401331, China

<sup>3</sup> National Synchrotron Radiation Laboratory and School of Nuclear Science and Technology, New Cornerstone Science Laboratory, University of Science and Technology of China, Hefei, 230026, China

<sup>4</sup> Collaborative Innovation Center of Advanced Microstructures, Nanjing, 210093, China

<sup>5</sup> Shanghai Research Center for Quantum Sciences, Shanghai, 201315, China

## 1. Short-ranged charge order in sample #1

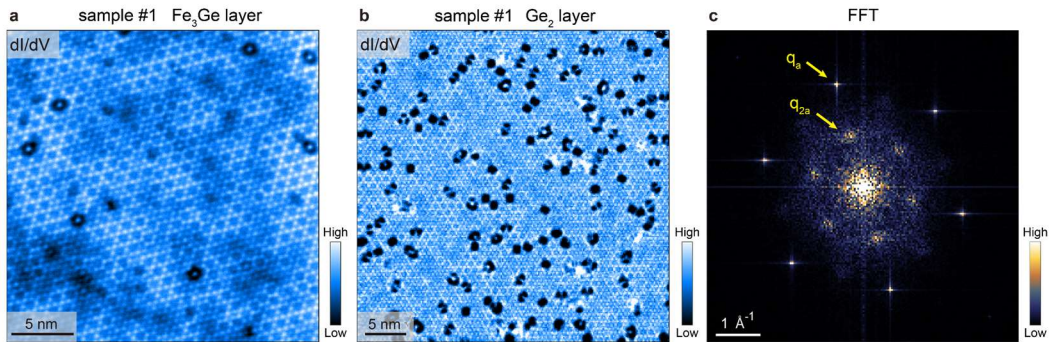

**Fig. S1 | Short-ranged CO in sample #1.** **a,b**, Typical  $dI/dV$  maps of the  $\text{Fe}_3\text{Ge}$  and  $\text{Ge}_2$  layers of sample #1, showing a short-ranged CO in both surfaces. Panel **a** is adapted from ref. 1. **c**, FFT image of panel **a**, with the Bragg spots of underlying lattice and the CO spots labeled as  $q_a$  and  $q_{2a}$ , respectively. The  $q_{2a}$  spots are much more broadened than the  $q_a$  spots, further demonstrating the short-ranged behavior of the CO in sample #1. Measurement conditions: **a**,  $V_b = 0.3$  V,  $I_t = 300$  pA,  $\Delta V = 30$  mV; **b**,  $V_b = 0.4$  V,  $I_t = 200$  pA,  $\Delta V = 5$  mV.

## 2. Density of defects in more sample regions of samples #1 and #2

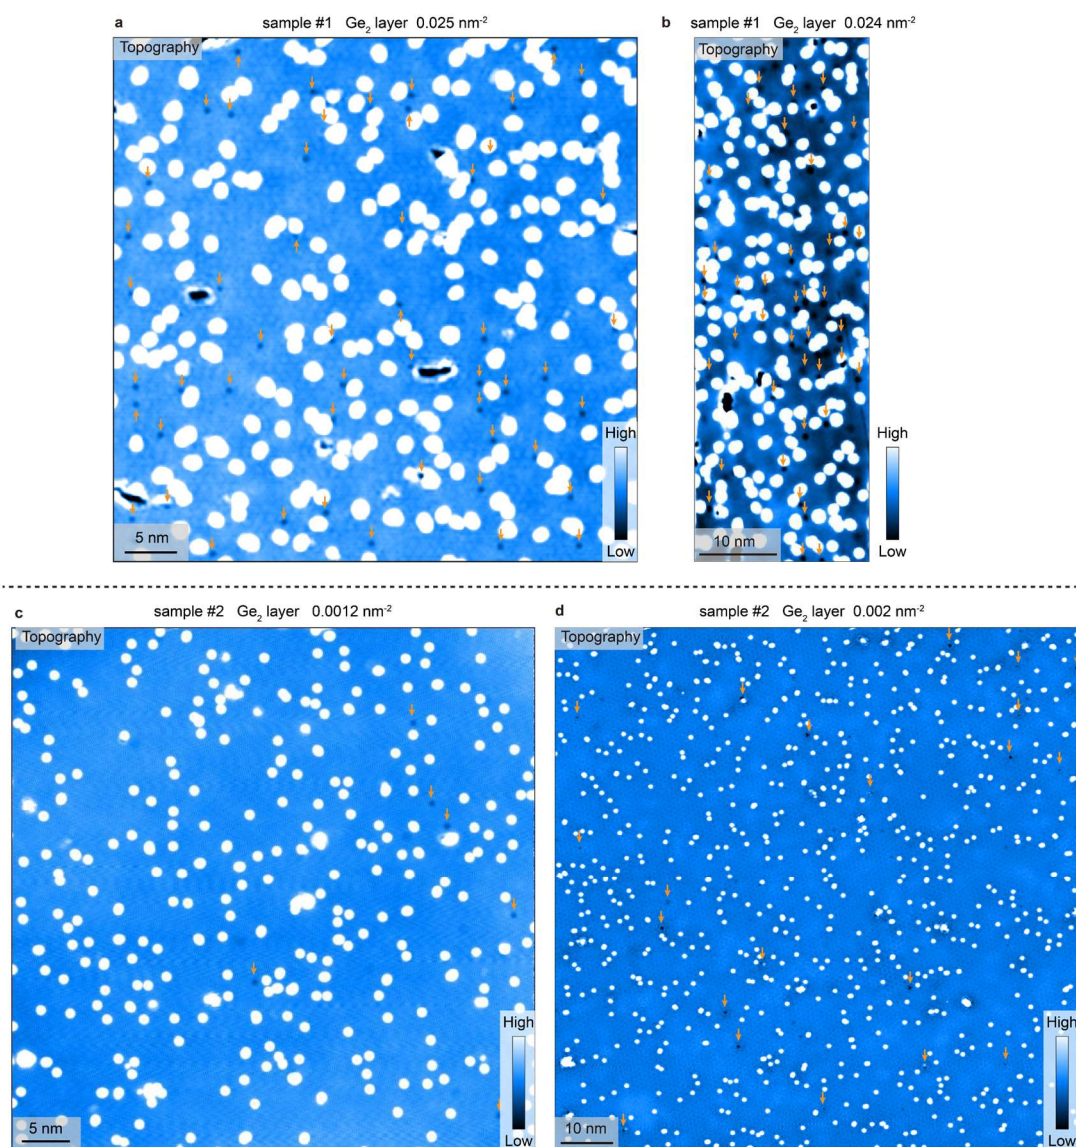

**Fig. S2 | More datasets for defect distribution in the Ge<sub>2</sub> layers of samples #1 and #2.** a,b, Typical topographic images of Ge<sub>2</sub> layer in sample #1. c,d, Typical topographic images of Ge<sub>2</sub> layer in sample #2. The native defects are indicated by the orange arrows and their total densities are shown. Measurement conditions: a,b,  $V_b = 1.0$  V,  $I_t = 10$  pA; c,  $V_b = 1.0$  V,  $I_t = 100$  pA; d,  $V_b = 12$  mV,  $I_t = 300$  pA.

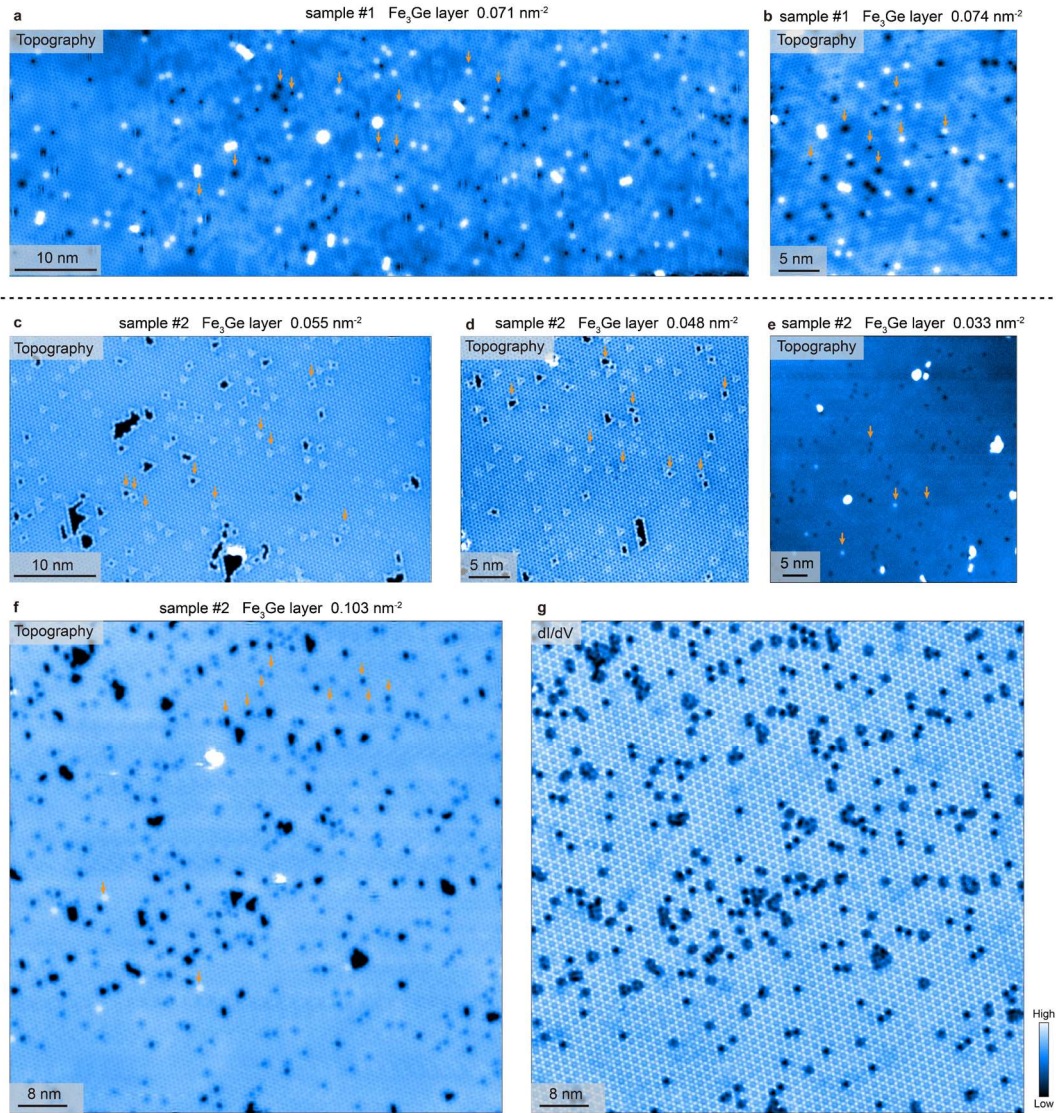

**Fig. S3 | More datasets for defect distribution in the  $\text{Fe}_3\text{Ge}$  layers of samples #1 and #2.** **a,b**, Typical topographic images of  $\text{Fe}_3\text{Ge}$  layer in sample #1. **c-f**, Typical topographic images of  $\text{Fe}_3\text{Ge}$  layer in sample #2. **g**,  $dI/dV$  map in the region shown in panel **f**, exhibiting a long-ranged CO. Partial native defects are indicated by the orange arrows and the total densities of defects are shown. Measurement conditions: **a**,  $V_b = 1.0 \text{ V}$ ,  $I_t = 20 \text{ pA}$ ; **b**,  $V_b = 1.0 \text{ V}$ ,  $I_t = 10 \text{ pA}$ ; **c,d**,  $V_b = -40 \text{ mV}$ ,  $I_t = 300 \text{ pA}$ ; **e**,  $V_b = 1.0 \text{ V}$ ,  $I_t = 50 \text{ pA}$ ; **f**,  $V_b = 1.0 \text{ V}$ ,  $I_t = 300 \text{ pA}$ ; **g**,  $V_b = 0.2 \text{ V}$ ,  $I_t = 300 \text{ pA}$ ,  $\Delta V = 20 \text{ mV}$ .

### 3. More datasets for the long-ranged $2 \times 2 \times 2$ CO in sample #2

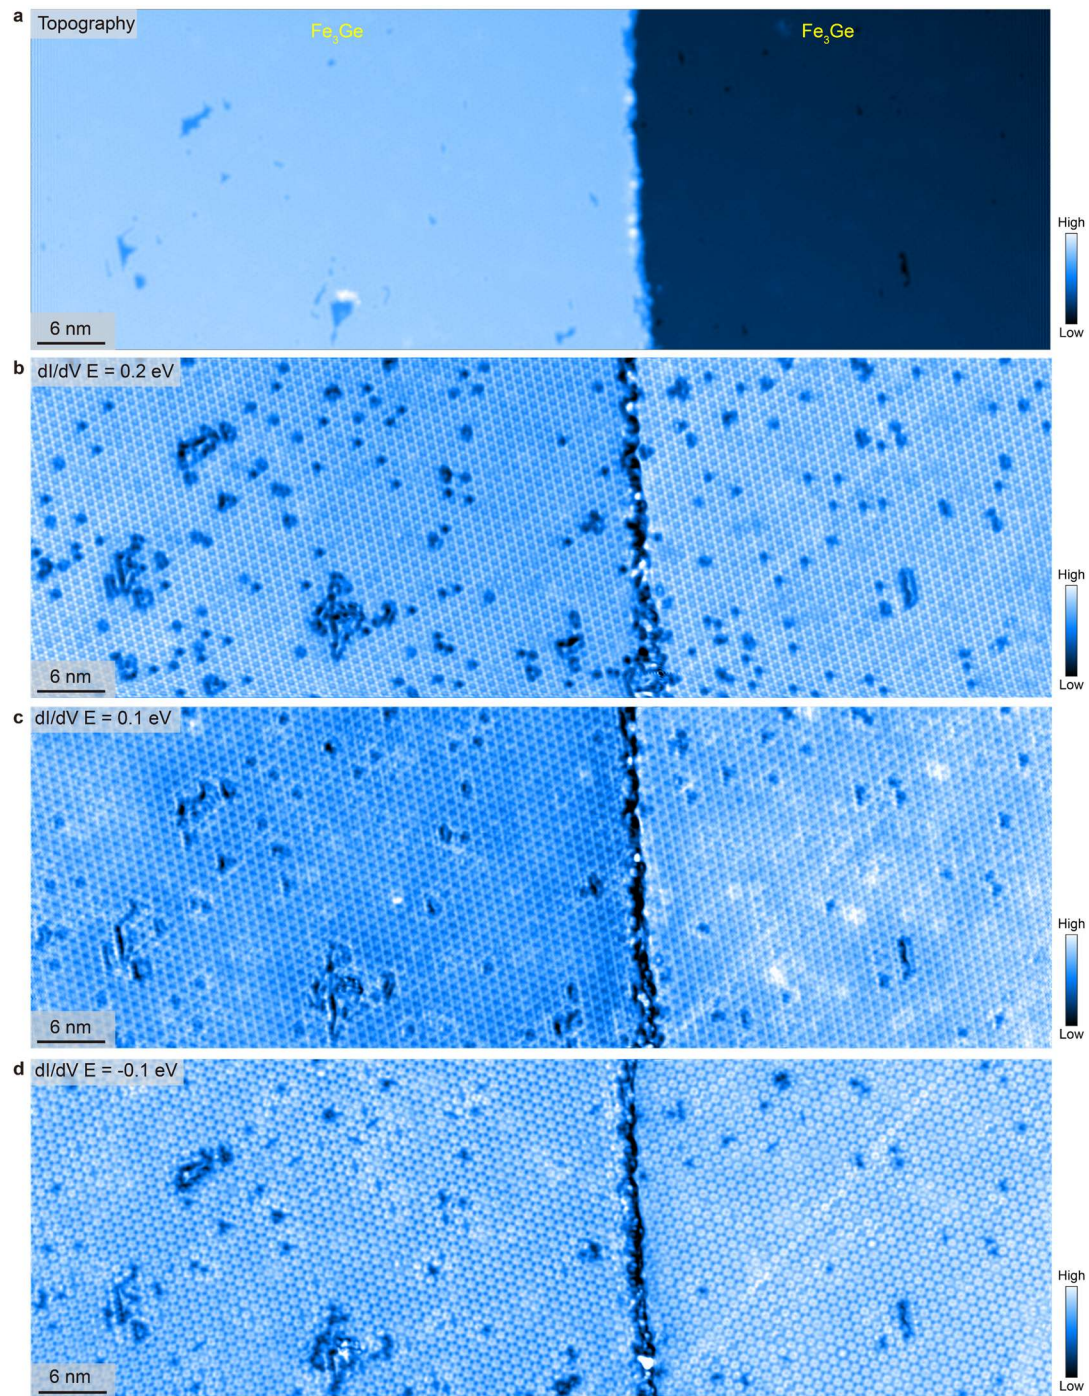

**Fig. S4 | Topographic image and more  $dI/dV$  maps under various energies for a  $\text{Fe}_3\text{Ge}$  region.** A long-ranged CO is obvious for all the maps, although the detailed CO patterns vary with energy. Measurement conditions: **a**,  $V_b = 0.3$  V,  $I_t = 300$  pA; **b**,  $V_b = 0.2$  V,  $I_t = 300$  pA,  $\Delta V = 20$  mV; **c**,  $V_b = 0.1$  V,  $I_t = 300$  pA,  $\Delta V = 20$  mV; **d**,  $V_b = -0.1$  V,  $I_t = 300$  pA,  $\Delta V = 20$  mV.

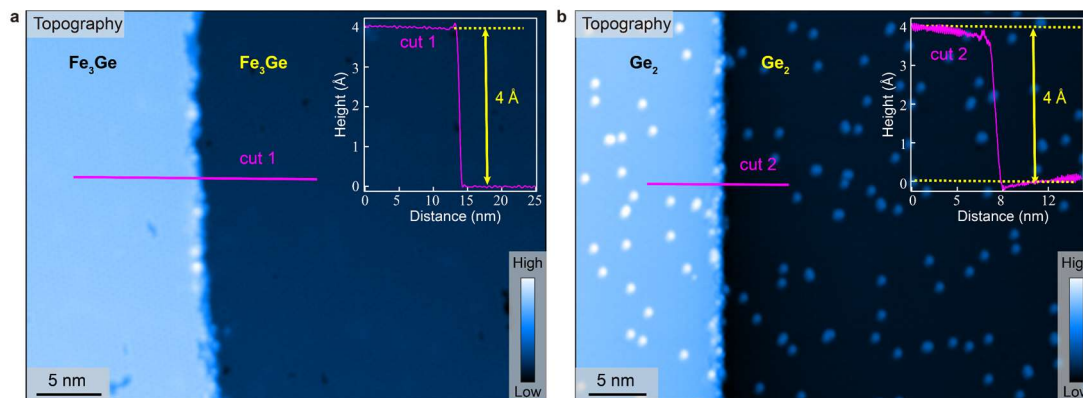

**Fig. S5 | Topographic images of Fig. 2a,b.** Insets: height profiles obtained along the magenta lines shown in panels a,b. The heights of the  $\text{Fe}_3\text{Ge}$ - $\text{Fe}_3\text{Ge}$  and  $\text{Ge}_2$ - $\text{Ge}_2$  single-unit-cell-height steps are  $\sim 4 \text{ \AA}$ . Measurement conditions: **a**,  $V_b = 0.3 \text{ V}$ ,  $I_t = 300 \text{ pA}$ ; **b**,  $V_b = 0.2 \text{ V}$ ,  $I_t = 300 \text{ pA}$ .

#### 4. Detailed SCXRD results for samples #1 and #2

SCXRD measurements were carried out on both samples #1 and #2 at 300 K and 85 K, respectively. The diffraction patterns of these two samples are the same at 300 K, but vary significantly at 85 K, as displayed in Fig. 3, S6 and S7. At 85 K, new spots are observed for sample #2 and signal a structural modulation with a wave vector of  $(-0.5, 0.5, 0.5)$ , while they are absent in sample #1. By using Olex2 software with Shlex program<sup>2,3</sup>, the corresponding crystal structures are solved and refined, as shown in Tables S1-S6 and Fig. S8. For both samples at 300 K, high quality refinements are achieved with the space group  $P6/mmm$ . The refined atomic coordinates are listed in Tables S2 and S5, and the corresponding crystal structure is sketched in Fig. 3c and S8a-d, which is consistent with the previous report<sup>4</sup>. The same space group and atomic coordinates can also describe the diffraction patterns of sample #1 at 85 K (Table S3). However, for the diffraction patterns of sample #2 at 85 K, a higher quality refinement is achieved with the space group  $P-6m2$ . The  $P-6m2$  unit cell presented in Table S4 is eight times larger than the primitive unit cell at 300 K, with the lattice doubling along all three lattice directions. The related atomic coordinates are listed in Table S6, and the corresponding crystal structure is sketched in Fig. 3d and S8e-h. The largest distortion occurs at the  $\text{Ge}1a$  sites in the Kagome layers, where the  $\text{Ge}1a$  atoms in the adjacent two layers dimerize and deviate from the Kagome layer by  $\sim 0.7 \text{ \AA}$ . Other atoms in the Kagome layer also undergo small distortions ( $< 5 \text{ pm}$ ), and are out-of-phase between adjacent Kagome layers.  $\text{Ge}1b$  atoms mainly distort along the  $c$ -axis, the Fe atoms are distorted both within the plane and along the  $c$ -axis. The distortion of  $\text{Ge}_2$  layer is simpler, showing a deformed Kekulé-type distortion and is out-of-phase between adjacent  $\text{Ge}_2$  layers.

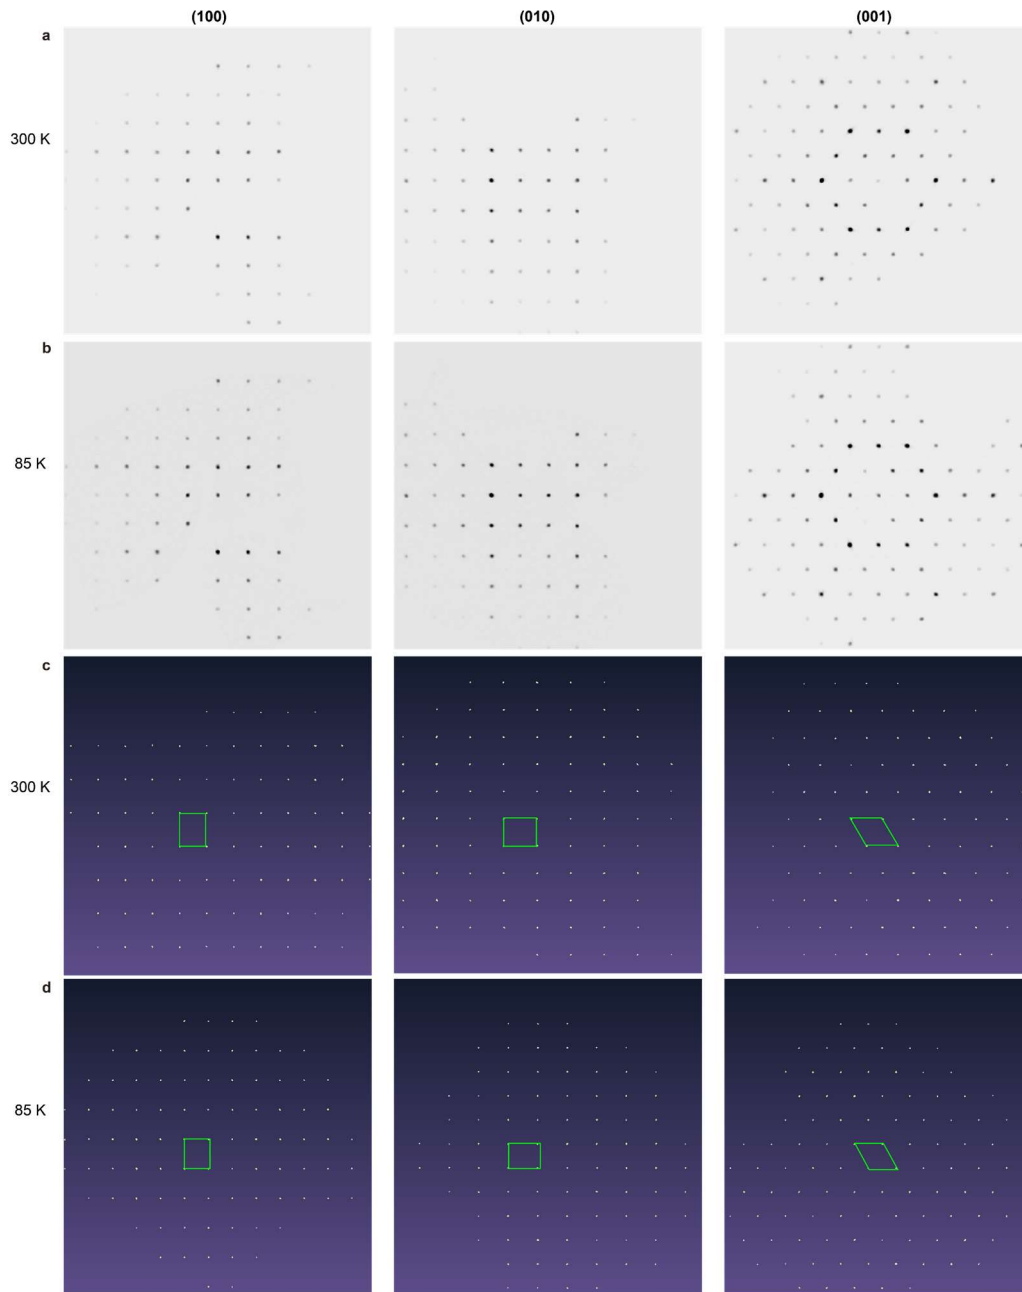

**Fig. S6 | Diffraction patterns (a and b) and lattice peaks (c and d) along the *a*-, *b*- and *c*-axes for sample #1, measured at 300 K and 85 K, respectively. Unit cells are indicated by the green rectangular and rhombic boxes. There are no obvious superstructure spots appeared at 85 K.**

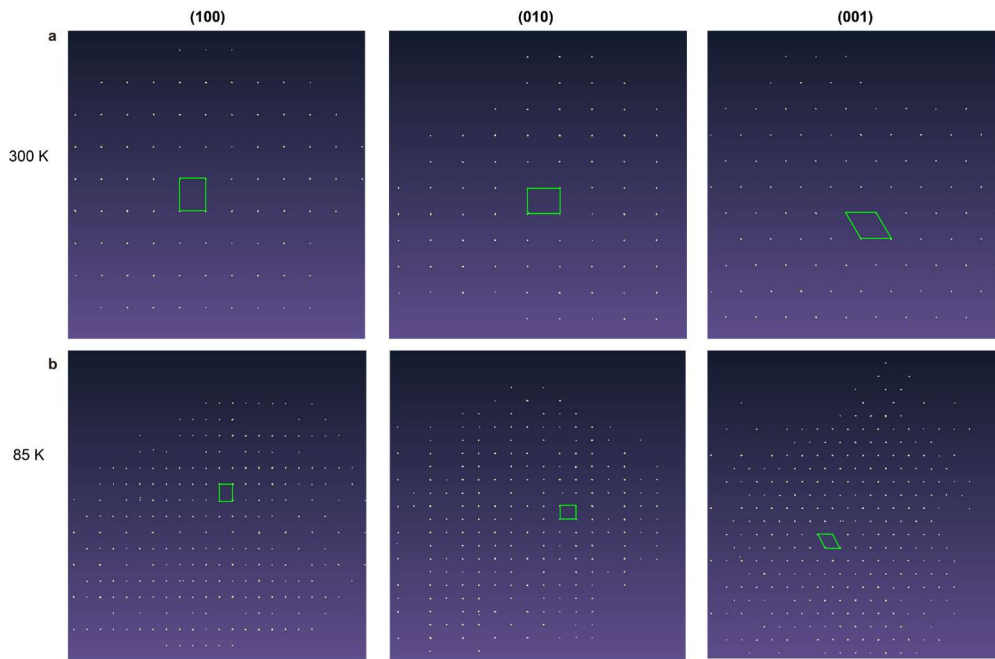

**Fig. S7 | Lattice peaks along the  $a$ -,  $b$ -, and  $c$ -axes for sample #2 measured at 300 K and 85 K, respectively.** Unit cells are indicated by the green rectangular and rhombic boxes. New spots appear at 85 K, signaling that the lattice doubles along all three lattice directions.

**Table S1. Crystal data and structure refinement for sample #1 at 300 and 85 K.**

| Temperature/K                               | 300                                                         | 85                                                          |
|---------------------------------------------|-------------------------------------------------------------|-------------------------------------------------------------|
| Empirical formula                           | FeGe                                                        | FeGe                                                        |
| Formula weight                              | 128.44                                                      | 128.44                                                      |
| Crystal system                              | hexagonal                                                   | hexagonal                                                   |
| Space group                                 | P6/mmm                                                      | P6/mmm                                                      |
| a/Å                                         | 4.9956(8)                                                   | 4.9859(4)                                                   |
| b/Å                                         | 4.9956(8)                                                   | 4.9859(4)                                                   |
| c/Å                                         | 4.0606(7)                                                   | 4.0471(4)                                                   |
| $\alpha$ /°                                 | 90                                                          | 90                                                          |
| $\beta$ /°                                  | 90                                                          | 90                                                          |
| $\gamma$ /°                                 | 120                                                         | 120                                                         |
| Volume/Å <sup>3</sup>                       | 87.76(3)                                                    | 87.131(17)                                                  |
| Z                                           | 3                                                           | 3                                                           |
| $\rho_{\text{calc}}/\text{cm}^3$            | 7.291                                                       | 7.343                                                       |
| $\mu/\text{mm}^{-1}$                        | 37.158                                                      | 37.426                                                      |
| F(000)                                      | 174                                                         | 174                                                         |
| Crystal size/mm <sup>3</sup>                | 0.16 × 0.14 × 0.14                                          | 0.16 × 0.14 × 0.14                                          |
| Radiation                                   | Mo K $\alpha$ ( $\lambda$ = 0.71073)                        | Mo K $\alpha$ ( $\lambda$ = 0.71073)                        |
| 2 $\theta$ range for data collection/°      | 9.424 to 58.64                                              | 9.442 to 58.496                                             |
| Index ranges                                | -6 ≤ h ≤ 5, -4 ≤ k ≤ 6, -5 ≤ l ≤ 4                          | -6 ≤ h ≤ 6, -6 ≤ k ≤ 6, -4 ≤ l ≤ 5                          |
| Reflections collected                       | 505                                                         | 591                                                         |
| Independent reflections                     | 68 [R <sub>int</sub> = 0.0335, R <sub>sigma</sub> = 0.0218] | 67 [R <sub>int</sub> = 0.0408, R <sub>sigma</sub> = 0.0200] |
| Data/restraints/parameters                  | 68/0/8                                                      | 67/0/9                                                      |
| Goodness-of-fit on F <sup>2</sup>           | 1.154                                                       | 1.213                                                       |
| Final R indexes [I ≥ 2 $\sigma$ (I)]        | R <sub>1</sub> = 0.0359, wR <sub>2</sub> = 0.0923           | R <sub>1</sub> = 0.0569, wR <sub>2</sub> = 0.1371           |
| Final R indexes [all data]                  | R <sub>1</sub> = 0.0359, wR <sub>2</sub> = 0.0923           | R <sub>1</sub> = 0.0569, wR <sub>2</sub> = 0.1371           |
| Largest diff. peak/hole / e Å <sup>-3</sup> | 3.97/-1.75                                                  | 9.64/-4.79                                                  |

**Table S2. Refined atomic coordinates and equivalent isotropic displacement (U<sub>eq</sub>) parameters for sample #1 at 300 K.**

| Atom | x   | y   | z   | U <sub>eq</sub> | Occ. |
|------|-----|-----|-----|-----------------|------|
| Ge1  | 2/3 | 1/3 | 1/2 | 0.007           | 1.0  |
| Ge2  | 0   | 0   | 0   | 0.012           | 1.0  |
| Fe1  | 1/2 | 1/2 | 0   | 0.006           | 1.0  |

**Table S3. Refined atomic coordinates and equivalent isotropic displacement ( $U_{eq}$ ) parameters for sample #1 at 85 K.**

| Atom       | $x$ | $y$ | $z$ | $U_{eq}$ | Occ. |
|------------|-----|-----|-----|----------|------|
| <b>Ge1</b> | 2/3 | 1/3 | 1/2 | -0.003   | 1.0  |
| <b>Ge2</b> | 0   | 0   | 0   | 0.011    | 1.0  |
| <b>Fe1</b> | 1/2 | 1/2 | 0   | -0.001   | 1.0  |

**Table S4. Crystal data and structure refinement for sample #2 at 300 and 85 K.**

| Temperature/K                               | 300                                                         | 85                                                           |
|---------------------------------------------|-------------------------------------------------------------|--------------------------------------------------------------|
| Empirical formula                           | FeGe                                                        | FeGe                                                         |
| Formula weight                              | 128.44                                                      | 128.44                                                       |
| Crystal system                              | hexagonal                                                   | hexagonal                                                    |
| Space group                                 | P6/mmm                                                      | P-6m2                                                        |
| a/Å                                         | 4.9948(6)                                                   | 9.9552(8)                                                    |
| b/Å                                         | 4.9948(6)                                                   | 9.9552(8)                                                    |
| c/Å                                         | 4.0534(5)                                                   | 8.0817(7)                                                    |
| $\alpha$ /°                                 | 90                                                          | 90                                                           |
| $\beta$ /°                                  | 90                                                          | 90                                                           |
| $\gamma$ /°                                 | 120                                                         | 120                                                          |
| Volume/Å <sup>3</sup>                       | 87.57(2)                                                    | 693.64(13)                                                   |
| Z                                           | 3                                                           | 24                                                           |
| $\rho_{\text{calc}}/\text{cm}^3$            | 7.306                                                       | 7.379                                                        |
| $\mu/\text{mm}^{-1}$                        | 37.237                                                      | 37.610                                                       |
| F(000)                                      | 174.0                                                       | 1392.0                                                       |
| Crystal size/mm <sup>3</sup>                | 0.08 × 0.07 × 0.14                                          | 0.08 × 0.07 × 0.14                                           |
| Radiation                                   | Mo K $\alpha$ ( $\lambda$ = 0.71073)                        | Mo K $\alpha$ ( $\lambda$ = 0.71073)                         |
| 2 $\theta$ range for data collection/°      | 9.424 to 58.664                                             | 6.91 to 58.65                                                |
| Index ranges                                | -6 ≤ h ≤ 6, -6 ≤ k ≤ 6,<br>-5 ≤ l ≤ 5                       | -11 ≤ h ≤ 12, -12 ≤ k ≤ 13,<br>-10 ≤ l ≤ 9                   |
| Reflections collected                       | 607                                                         | 3493                                                         |
| Independent reflections                     | 69 [R <sub>int</sub> = 0.0329, R <sub>sigma</sub> = 0.0158] | 705 [R <sub>int</sub> = 0.0256, R <sub>sigma</sub> = 0.0206] |
| Data/restraints/parameters                  | 69/0/9                                                      | 705/0/55                                                     |
| Goodness-of-fit on F <sup>2</sup>           | 1.278                                                       | 1.092                                                        |
| Final R indexes [I ≥ 2 $\sigma$ (I)]        | R <sub>1</sub> = 0.0180, wR <sub>2</sub> = 0.0388           | R <sub>1</sub> = 0.0317, wR <sub>2</sub> = 0.0724            |
| Final R indexes [all data]                  | R <sub>1</sub> = 0.0180, wR <sub>2</sub> = 0.0388           | R <sub>1</sub> = 0.0385, wR <sub>2</sub> = 0.0777            |
| Largest diff. peak/hole / e Å <sup>-3</sup> | 2.29/-1.20                                                  | 3.38/-1.68                                                   |

**Table S5. Refined atomic coordinates and equivalent isotropic displacement ( $U_{\text{eq}}$ ) parameters for sample #2 at 300 K.**

| Atom | x   | y   | z   | $U_{\text{eq}}$ | Occ. |
|------|-----|-----|-----|-----------------|------|
| Ge1  | 2/3 | 1/3 | 1/2 | 0.007           | 1.0  |
| Ge2  | 0   | 0   | 0   | 0.011           | 1.0  |
| Fe1  | 1/2 | 1/2 | 0   | 0.006           | 1.0  |

**Table S6. Refined atomic coordinates and equivalent isotropic displacement ( $U_{eq}$ ) parameters for sample #2 at 85 K.**

| Atom | x      | y      | z      | $U_{eq}$ | Occ. |
|------|--------|--------|--------|----------|------|
| Ge1a | 2/3    | 1/3    | 0.1656 | 0.006    | 1    |
| Ge1b | 0.1666 | 0.3332 | 0.2526 | 0.003    | 1    |
| Fe1a | 0.1661 | 0.0830 | 0.2530 | 0.001    | 1    |
| Fe1b | 0.4161 | 0.3343 | 0.2469 | 0.002    | 1    |
| Fe1c | 0.4171 | 0.5829 | 0.2530 | 0.002    | 1    |
| Ge2a | 0      | 0      | 1/2    | -0.002   | 1    |
| Ge2b | 1/3    | 2/3    | 1/2    | 0.005    | 1    |
| Ge2c | 0.3440 | 0.1720 | 1/2    | 0.006    | 1    |
| Ge2d | 0.5043 | 0.4957 | 1/2    | -0.002   | 1    |
| Ge2e | 0      | 0      | 0      | -0.003   | 1    |
| Ge2f | 1/3    | 2/3    | 0      | 0.007    | 1    |
| Ge2g | 0.3268 | 0.1634 | 0      | 0.006    | 1    |
| Ge2h | 0.4967 | 0.5032 | 0      | -0.003   | 1    |

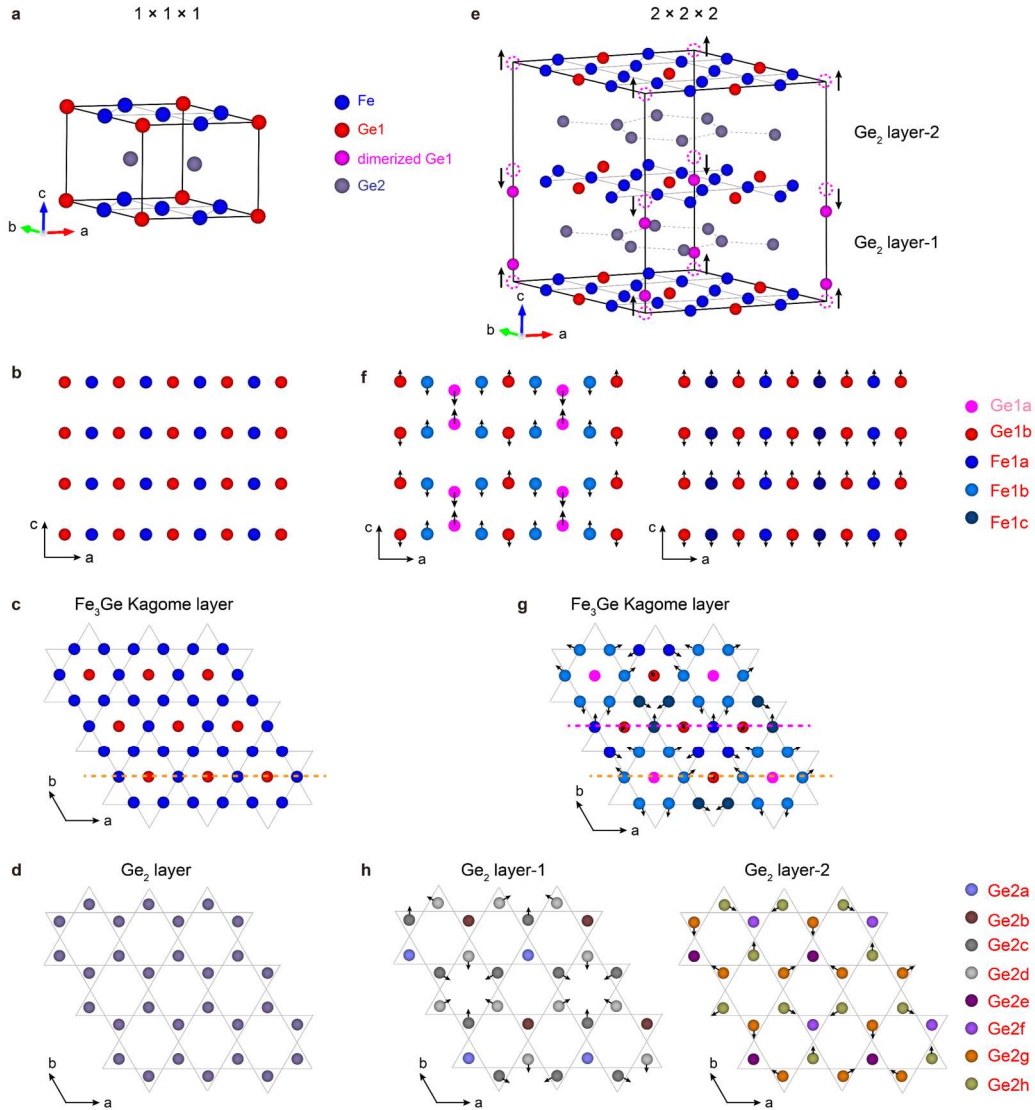

**Fig. S8 | Detailed lattice distortion of the CO superstructure.** **a-d**, Lattice structure of FeGe at 300 K. Panel **b** shows the projection of (010) plane along the direction indicated by the orange dashed line in panel **c**. **e-h**, Detailed lattice structure of the CO superstructure measured at 85 K. Panel **f** shows the projections of (010) planes along the directions indicated by the orange and magenta dashed lines in panel **g**, exhibiting atomic distortions along the  $c$ -axis. **g,h**, In-plane atomic distortions in the  $\text{Fe}_3\text{Ge}$  and  $\text{Ge}_2$  layers. The black arrows indicate the direction and magnitude of atom distortion.

## 5. More datasets for CO disruption

Figure S9 shows the details of the  $2 \times 2 \times 2$  CO (Fig. S9a-d) and the  $1 \times 1 \times 1$  phase (Fig. S9e-h) obtained after CO disruption. By repeating the CO disruption process, the  $2 \times 2 \times 2$  CO disappears completely, leaving a pure  $1 \times 1 \times 1$  phase, as reflected more clearly in the FFT images (Fig. S9f and S9h). Moreover, we have measured the topographic images of several phase separation regions in both the  $\text{Fe}_3\text{Ge}$  and  $\text{Ge}_2$  layers under various energies, as shown in Fig. S10. We find that in all cases, the lattice of the  $1 \times 1 \times 1$  phase is slightly higher by 6-7 pm than that of the  $2 \times 2 \times 2$  CO phase.

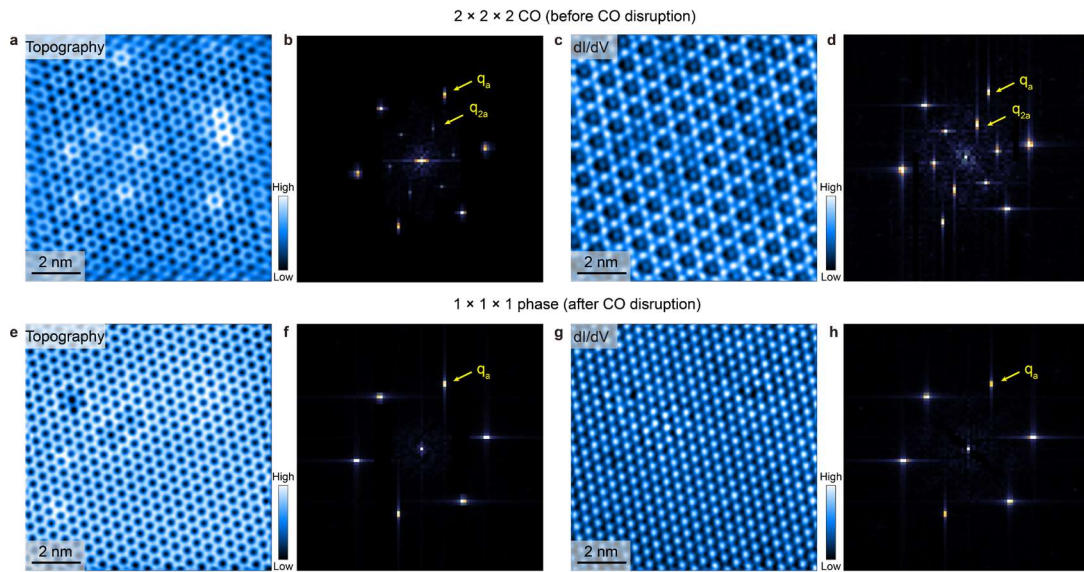

**Fig. S9 | Details of the  $2 \times 2 \times 2$  CO and the  $1 \times 1 \times 1$  phase obtained after CO disruption.** a-d, Typical topographic image,  $dI/dV$  map and corresponding FFT images of a selected  $\text{Fe}_3\text{Ge}$  region before CO disruption. e-h, Typical topographic image,  $dI/dV$  map and corresponding FFT images of the same  $\text{Fe}_3\text{Ge}$  region after CO disruption. The  $2 \times 2 \times 2$  CO disappears completely after CO disruption, leaving a pure  $1 \times 1 \times 1$  phase. Measurement conditions: a,e,  $V_b = 0.2$  V,  $I_t = 300$  pA; c,g,  $V_b = 0.2$  V,  $I_t = 300$  pA,  $\Delta V = 30$  mV.

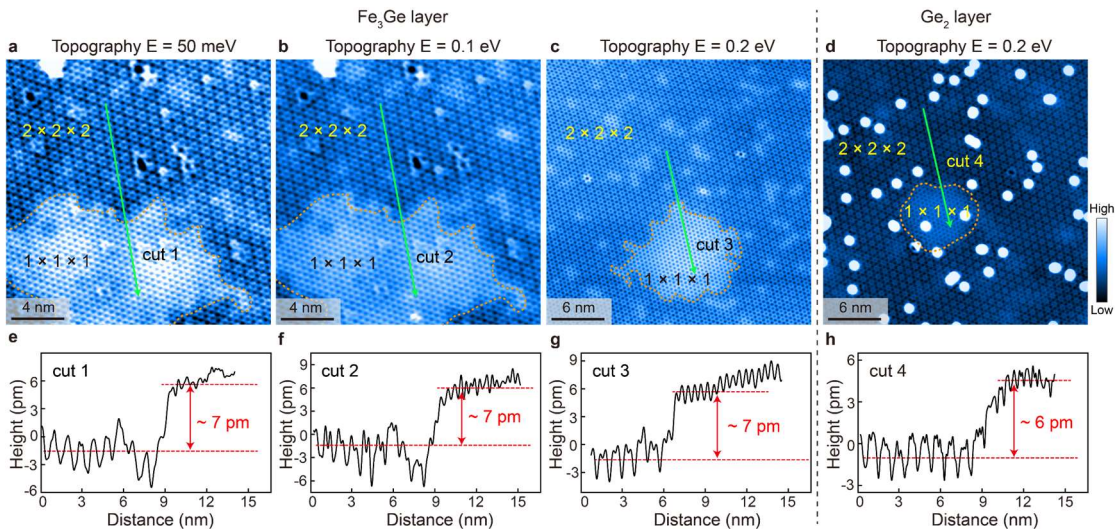

**Fig. S10 | Height difference between the  $2 \times 2 \times 2$  CO and the  $1 \times 1 \times 1$  phase in both the  $\text{Fe}_3\text{Ge}$  and  $\text{Ge}_2$  layers.** a-c, Typical topographic images of the phase separation regions in  $\text{Fe}_3\text{Ge}$  layer, measured under different energies. d, Typical topographic image of the phase separation region in  $\text{Ge}_2$  layer. e-h, Lattice line profiles taken along cuts 1-4, as indicated in panels a-d. A height difference of 6-7 pm is obtained for all the cases. Measurement conditions: a,  $V_b = 50$  mV,  $I_t = 300$  pA; b,  $V_b = 0.1$  V,  $I_t = 300$  pA; c,d,  $V_b = 0.2$  V,  $I_t = 300$  pA.

#### Supplementary References:

1. Chen, Z. Y. et al. Charge density wave with strong quantum phase fluctuations in Kagome magnet FeGe. ArXiv: 2302.04490 (2023).
2. Dolomanov, O.V. et al. OLEX2: a complete structure solution, refinement and analysis program. *J. Appl. Cryst.* **42**, 339 (2009).
3. Sheldrick, G. M. A short history of SHELX. *Acta Cryst.* **A64**, 112 (2008).
4. Teng, X. K. et al. Discovery of charge density wave in a kagome lattice antiferromagnet. *Nature* **609**, 490 (2022).
